# Supplementary material for: Meta-analysis of coagulation disbalances in COVID-19: 41 studies and 17601 patients
Source: bioRxiv or medRxiv preprint supplement (doi:10.1101/2021.10.17.21265108), 2021-10-18
Supplement: Supplementary file [file media-1.pdf]

## Meta-analysis of coagulation disbalances in COVID-19: 41 studies and 17601 patients

**Polina Len<sup>1</sup>, Gaukhar Iskakova<sup>1,#</sup>, Zarina Sautbayeva<sup>1,#</sup>, Aigul Kussanova<sup>1,2,#</sup>, Ainur T. Tauekelova<sup>3</sup>, Madina M. Sugralimova<sup>3</sup>, Anar S. Dautbaeva<sup>3</sup>, Meruert M. Abdieva<sup>3</sup>, Eugene D. Ponomarev<sup>4</sup>, Alexander Tikhonov<sup>1</sup>, Makhabbat S. Bekbossynova<sup>3,\*</sup>, Natasha S. Barteneva<sup>1,5,6\*</sup>**

<sup>1</sup>School of Sciences and Humanities, Nazarbayev University, Nur-Sultan, Kazakhstan

<sup>2</sup>Core Facilities, Nazarbayev University, Nur-Sultan, Kazakhstan

<sup>3</sup>National Research Center for Cardiac Surgery, Nur-Sultan, Kazakhstan

<sup>4</sup>School of Biomedical Sciences, Chinese University of Hong Kong, Shatin, Hong Kong

<sup>5</sup>National Laboratory Astana, Nur-Sultan, Kazakhstan

<sup>6</sup>Brigham and Women's Hospital, Harvard Medical School, Boston, USA

<sup>#</sup>These authors made an equal contribution in the study

<sup>\*</sup>Joint senior authors

## ***Supplementary Material 1***

**Supplementary File 1.** Criteria for clinical severity of COVID-19 used by the National Research Center for Cardiac Surgery.

- mild - fever  $<39^{\circ}\text{C}$ ,  $\text{SpO}_2 > 95\%$  on room air, no dyspnea, respiratory rate  $< 20$  breaths/min, no imaging findings of pneumonia;
- moderate - fever  $>38^{\circ}\text{C}$ ,  $\text{SpO}_2$  94- 95% on room air, dyspnea on exertion, respiratory rate  $< 20$ -22 breaths/min, CT extent of lung damage  $<50\%$ ;
- severe – any fever,  $\text{SpO}_2$  90-93%, dyspnea at less-than-ordinary activity or rest, respiratory rate 23-30 breaths/min, CT extent of lung damage  $>50\%$ ;
- critical - any fever,  $\text{SpO}_2 <90\%$ , dyspnea at rest, respiratory rate  $>30$  breaths/min, CT extent of lung damage 75-100%;

**Supplementary Table 1.** Results of the NIH Quality Assessment.

|                    | 1. Was the research question or objective in this paper clearly stated? | 2. Was the study population clearly specified and defined? | 3. Was the participation rate of eligible persons at least 50%? | 4. Were all the subjects selected or recruited from the same or similar populations? | 5. Was a sample size justification, power description, or variance and effect estimates provided? | 6. For the analyses in this paper, were the exposure(s) of interest measured prior to the outcome(s) being measured? | 7. Was the timeframe sufficient so that one could reasonably expect to see an association between exposure and outcome if it existed? | 8. For exposures that can vary in amount or level, did the study examine different levels of the exposure as related to the outcome? | 9. Were the exposure measures (independent variables) clearly defined, valid, reliable, and implemented consistently across all study participants? | 10. Was the exposure(s) assessed more than once over time? | 11. Were the outcome measures (dependent variables) clearly defined, valid, reliable, and implemented consistently across all study participants? | 12. Were the outcome assessors blinded to the exposure status of participants? | 13. Was loss to follow-up after baseline 20% or less? | 14. Were key potential confounding variables measured and adjusted statistically for their impact on the relationship between exposure(s) and outcome(s)? | Score |
|--------------------|-------------------------------------------------------------------------|------------------------------------------------------------|-----------------------------------------------------------------|--------------------------------------------------------------------------------------|---------------------------------------------------------------------------------------------------|----------------------------------------------------------------------------------------------------------------------|---------------------------------------------------------------------------------------------------------------------------------------|--------------------------------------------------------------------------------------------------------------------------------------|-----------------------------------------------------------------------------------------------------------------------------------------------------|------------------------------------------------------------|---------------------------------------------------------------------------------------------------------------------------------------------------|--------------------------------------------------------------------------------|-------------------------------------------------------|-----------------------------------------------------------------------------------------------------------------------------------------------------------|-------|
| Liao et al.        | ✓                                                                       | ✓                                                          | ✓                                                               | ✓                                                                                    | ✗                                                                                                 | NA                                                                                                                   | NA                                                                                                                                    | ✓                                                                                                                                    | ✓                                                                                                                                                   | NA                                                         | ✓                                                                                                                                                 | NA                                                                             | NA                                                    | ✗                                                                                                                                                         | 7     |
| Shang et al.       | ✓                                                                       | ✓                                                          | ✓                                                               | ✓                                                                                    | ✗                                                                                                 | NA                                                                                                                   | NA                                                                                                                                    | ✓                                                                                                                                    | ✓                                                                                                                                                   | NA                                                         | ✓                                                                                                                                                 | NA                                                                             | NA                                                    | ✗                                                                                                                                                         | 7     |
| Rauch et al.       | ✓                                                                       | ✓                                                          | ✓                                                               | ✓                                                                                    | ✗                                                                                                 | NA                                                                                                                   | ✓                                                                                                                                     | NA                                                                                                                                   | ✓                                                                                                                                                   | ✓                                                          | ✓                                                                                                                                                 | NA                                                                             | NA                                                    | ✗                                                                                                                                                         | 8     |
| Gerotziafas et al. | ✓                                                                       | ✓                                                          | ✓                                                               | ✓                                                                                    | ✗                                                                                                 | ✓                                                                                                                    | ✓                                                                                                                                     | NA                                                                                                                                   | ✓                                                                                                                                                   | ✓                                                          | ✓                                                                                                                                                 | NA                                                                             | NA                                                    | ✗                                                                                                                                                         | 9     |
| Cen et al.         | ✓                                                                       | ✓                                                          | NR                                                              | ✓                                                                                    | ✗                                                                                                 | NA                                                                                                                   | ✓                                                                                                                                     | ✓                                                                                                                                    | ✓                                                                                                                                                   | ✓                                                          | ✓                                                                                                                                                 | NA                                                                             | NA                                                    | ✗                                                                                                                                                         | 8     |
| P. Wang et al.     | ✓                                                                       | ✓                                                          | ✓                                                               | ✓                                                                                    | ✗                                                                                                 | NA                                                                                                                   | NA                                                                                                                                    | ✓                                                                                                                                    | ✓                                                                                                                                                   | ✓                                                          | ✓                                                                                                                                                 | NA                                                                             | NA                                                    | ✗                                                                                                                                                         | 8     |
| Di Micco et al.    | ✓                                                                       | ✓                                                          | ✓                                                               | ✓                                                                                    | ✗                                                                                                 | NA                                                                                                                   | NA                                                                                                                                    | NA                                                                                                                                   | ✓                                                                                                                                                   | NA                                                         | ✓                                                                                                                                                 | NA                                                                             | NA                                                    | ✗                                                                                                                                                         | 6     |
| Bauer et al.       | ✓                                                                       | ✓                                                          | CD                                                              | ✓                                                                                    | ✗                                                                                                 | NA                                                                                                                   | ✓                                                                                                                                     | NA                                                                                                                                   | ✓                                                                                                                                                   | ✓                                                          | ✓                                                                                                                                                 | NA                                                                             | NA                                                    | ✗                                                                                                                                                         | 7     |
| J. Zhang et al.    | ✓                                                                       | ✓                                                          | ✓                                                               | ✓                                                                                    | ✗                                                                                                 | NA                                                                                                                   | NA                                                                                                                                    | NA                                                                                                                                   | ✓                                                                                                                                                   | NA                                                         | ✓                                                                                                                                                 | NA                                                                             | NA                                                    | ✗                                                                                                                                                         | 6     |

|                             |   |   |    |    |   |    |    |    |    |    |   |    |    |   |    |
|-----------------------------|---|---|----|----|---|----|----|----|----|----|---|----|----|---|----|
| Lopez-Castaneda et al.      | ✓ | ✓ | ✓  | ✓  | × | NA | NA | NA | ✓  | NA | ✓ | NA | NA | × | 6  |
| Yue et al.                  | ✓ | ✓ | ✓  | ✓  | × | NA | NA | NA | ✓  | NA | ✓ | NA | NA | × | 6  |
| White et al.                | ✓ | ✓ | NR | ✓  | × | NA | NA | ✓  | ✓  | NA | ✓ | NA | NA | × | 6  |
| Noh et al.                  | ✓ | ✓ | NA | ✓  | ✓ | NA | ✓  | ✓  | ✓  | ×  | ✓ | NA | NA | ✓ | 9  |
| Bergantini et al.           | ✓ | ✓ | NA | ✓  | × | NA | NA | NA | ✓  | NA | ✓ | NA | NA | × | 5  |
| Jie Liu et al.              | ✓ | ✓ | NR | NR | × | NA | ✓  | ✓  | ✓  | ✓  | ✓ | NA | NA | ✓ | 8  |
| Jiac Liu et al.             | ✓ | ✓ | NR | NR | × | NA | ✓  | ✓  | ✓  | NR | ✓ | NA | NA | ✓ | 7  |
| J. Zhao et al.              | ✓ | ✓ | ✓  | ✓  | × | NA | NA | ✓  | ✓  | NR | ✓ | NA | NA | ✓ | 8  |
| Karakoyun et al.            | ✓ | ✓ | ✓  | ✓  | × | NA | ✓  | ✓  | ✓  | ✓  | ✓ | NA | NA | × | 9  |
| X. Zheng et al.             | ✓ | ✓ | NA | ✓  | × | NA | ✓  | ✓  | ✓  | ✓  | ✓ | ✓  | NA | ✓ | 10 |
| Y. Zhao et al.              | ✓ | ✓ | NA | ✓  | × | NA | NA | ✓  | ✓  | NA | ✓ | NA | NA | × | 6  |
| Bastug et al.               | ✓ | ✓ | NA | ✓  | × | NA | ✓  | NA | ✓  | ✓  | ✓ | NA | NA | × | 7  |
| W Liu et al.                | ✓ | ✓ | NA | ✓  | × | NA | ✓  | ✓  | ✓  | ✓  | ✓ | NA | NA | ✓ | 9  |
| Fu et al.                   | ✓ | ✓ | NA | ✓  | × | NA | NA | ✓  | ✓  | NA | ✓ | NA | NA | × | 6  |
| H. Zhang et al.             | ✓ | ✓ | NR | NR | × | NA | NA | ✓  | ✓  | NA | ✓ | NA | NA | ✓ | 6  |
| Aloisio et al.              | ✓ | ✓ | NA | ✓  | × | ✓  | ✓  | NA | NA | ✓  | ✓ | NA | NA | × | 7  |
| Mikami et al.               | ✓ | ✓ | NA | ✓  | × | NA | NA | ✓  | ✓  | NA | ✓ | NA | NA | × | 6  |
| Young et al.                | ✓ | ✓ | ✓  | NR | × | NA | NA | NA | ✓  | ✓  | ✓ | NA | NA | ✓ | 7  |
| Higuera-de-la-Tijera et al. | ✓ | ✓ | ✓  | ✓  | ✓ | NA | NA | ✓  | ✓  | NR | ✓ | NA | NA | × | 8  |

|                 |   |   |    |    |    |    |    |    |    |    |   |    |    |   |    |
|-----------------|---|---|----|----|----|----|----|----|----|----|---|----|----|---|----|
| Cugno et al.    | ✓ | ✓ | CD | ✓  | ✓  | NA | NA | CD | ✓  | NR | ✓ | NA | NA | × | 6  |
| N Chen et al.   | ✓ | ✓ | ✓  | ✓  | ×  | NA | NA | ✓  | ✓  | ×  | ✓ | NA | NA | ✓ | 8  |
| Wang et al.     | ✓ | ✓ | ×  | NR | ×  | NA | NA | ✓  | ✓  | NR | ✓ | NA | NA | × | 5  |
| Long et al.     | ✓ | ✓ | CD | ✓  | ×  | NA | NA | ✓  | ✓  | NR | ✓ | NA | NA | × | 6  |
| Yu et al.       | ✓ | ✓ | ✓  | NR | CD | NA | NA | ✓  | ✓  | NR | ✓ | NA | NA | ✓ | 7  |
| Suleyman et al. | ✓ | ✓ | CD | ✓  | ×  | NA | NA | ✓  | ✓  | NR | ✓ | NA | NA | ✓ | 7  |
| Z. Chen et al.  | ✓ | ✓ | ✓  | ✓  | ×  | NA | NA | ✓  | ✓  | NR | ✓ | NA | NA | ✓ | 8  |
| Ding et al.     | ✓ | ✓ | ✓  | NR | ×  | NA | NA | ✓  | ✓  | NR | ✓ | NA | NA | × | 6  |
| Q. Chen et al.  | ✓ | ✓ | ✓  | ×  | ×  | NA | NA | ✓  | ✓  | NR | ✓ | NA | NA | × | 6  |
| G. Zhang et al. | ✓ | ✓ | ✓  | NR | ×  | NA | NA | ✓  | ✓  | NR | ✓ | NA | NA | × | 6  |
| Jiao Liu et al. | ✓ | ✓ | ✓  | ✓  | ×  | ✓  | NA | ✓  | CD | ✓  | ✓ | NA | NA | ✓ | 9  |
| Zhou et al.     | ✓ | ✓ | ✓  | ✓  | ×  | ✓  | ✓  | ✓  | ✓  | NR | ✓ | NA | NA | ✓ | 10 |

**Supplementary Table 2.** Results of the Egger's test with Pustejovsky's corrected standard error

| Parameter | Intercept | Confidence Interval | t      | p-value |
|-----------|-----------|---------------------|--------|---------|
| PLT       | -1.306    | [-2.47, -0.14]      | -2.195 | 0.0355  |
| DD        | 3.228     | [1.24, 5.21]        | 3.184  | 0.0030  |
| FIB       | 2.142     | [0.1, 4.18]         | 2.061  | 0.0526  |
| APTT      | 0.717     | [-1.46, 2.89]       | 0.647  | 0.5255  |
| PT        | -0.506    | [-2.59, 1.58]       | -0.476 | 0.6389  |
